# Supplementary material for: Function of JARID2 in bovines during early embryonic development
Source: PeerJ. 2017 Dec 21;5:e4189. doi: 10.7717/peerj.4189 (PMC5742275; doi:10.7717/peerj.4189)
Supplement: Data S1 [file peerj-05-4189-s001.xlsx]

## Sheet: Fig 1
	Fig 1A
		GV	MII	2-cell	4-cell	8-cell	16-cell	Blastula
	1	1	2.781	1.721	2.679	2.269	2.283	1.759
	2	1	1.965	2.374	1.991	1.935	1.398	2.355
	3	1	2.385	2.095	2.381	1.998	1.57	1.685
	mean	1	2.377	2.06333	2.35033	2.06733	1.75033	1.933
	SD	0	0.333179	0.267525	0.281711	0.144901	0.383142	0.299924
	letter	a	b	b	b	b	b	b
	Fig.1C
		1	2	3	4	5
		2-cell	4-cell	8-cell	16-cell	Blastula
	1	40	55	60	34	46
	2	35	48	55	37	55
	3	36	51	50	31	42
	mean	37	51.3333	55	34	47.6667
	SD	2.16025	2.86744	4.08248	2.44949	5.4365
	P value		1-2,p=0.003	1-3,p=0.001	1-4,p=0.425	1-5,p=0.014

## Sheet: Fig 2
		Fig 2A
			NC	siRNA-2723	siRNA-2830	siRNA-3449
		1	1	0.827433	0.344007	0.7815
		2	1	0.832333	0.387593	0.761
		3	1	0.859527	0.366	0.756767
		mean	1	0.839764	0.365867	0.766422
		SD	0	0.0141165	0.0177944	0.0108008
		letter	a	b	c	d
		Fig 2B
		JARID2-NC-siRNA					JARID2-2830-siRNA
		MII oocytes	cleavage	cleavage rate	blastocyst	blastocyst rate	MII oocytes	cleavage	cleavage rate	blastocyst	blastocyst rate
	1	120	74	0.616667	23	0.191667	120	33	0.275	13	0.108333
	2	105	66	0.628571	19	0.180952	105	30	0.285714	11	0.104762
	3	120	72	0.6	24	0.2	120	34	0.283333	14	0.116667
	4	120	73	0.608333	15	0.125	120	30	0.25	15	0.125
	5	90	62	0.688889	22	0.244444	90	27	0.3	10	0.111111
	mean			0.628492		0.188413			0.27881		0.113175
	SD			0.0316411		0.0383699			0.0165026		0.00707819
	p value			p<0.01		p<0.05

## Sheet: Fig 3
	Fig 3A
		OCT4		SOX2		c-myc
		2-cell	Blastocyst	2-cell	Blastocyst	2-cell	Blastocyst
	1	1	0.501333	1	0.569	1	0.386
	2	1	0.581	1	0.428667	1	0.564667
	3	1	0.386	1	0.676667	1	0.249
	mean	1	0.489444	1	0.558111	1	0.399889
	SD	0	0.0800511	0	0.101538	0	0.129244
	p value	p<0.01		p<0.01		p<0.01
	Fig 3B
		JARID2		OCT4		SOX2		c-myc
		JARID2-NC-siRNA	JARID2-2830-siRNA	JARID2-NC-siRNA	JARID2-2830-siRNA	JARID2-NC-siRNA	JARID2-2830-siRNA	JARID2-NC-siRNA	JARID2-2830-siRNA
	1	1	0.590667	1	6.008	1	4.28667	1	4.38
	2	1	0.328	1	5.46767	1	3.85667	1	4.01667
	3	1	0.269333	1	5.61267	1	4.15	1	4.48267
	mean	1	0.396	1	5.69611	1	4.09778	1	4.29311
	SD	0	0.139718	0	0.228345	0	0.179389	0	0.199919
	p value	p<0.01		p<0.01		p<0.01		p<0.01

## Sheet: Fig 4
	Fig 4C
		2-cell		4-cell		8-cell		Blastula
		NC	siRNA	NC	siRNA	NC	siRNA	NC	siRNA
	1	39.031	9.975	35.658	8.428	23.806	15.761	31	26.861
	2	29.591	7.698	32.334	4.867	21.983	13.971	26.305	22.091
	3	27.389	6.335	23.498	6.188	17.21	10.775	21.174	17.061
	mean	32.0037	8.00267	30.4967	6.49433	20.9997	13.5023	26.1597	22.0043
	SD	5.04974	1.50156	5.13149	1.46982	2.78113	2.06233	4.01276	4.0013
	p value	p<0.01		p<0.01		p<0.05		P=0.358
